# Supplementary material
Source: PubMed Central journal article supplement (PMC7151468)
Supplement: mmc1.pdf [file mmc1.pdf]

**Supplemental Table. Definition of the Severity of COVID-19 Associated Pneumonia**

| Severity categories | Description                                                                                                                                                                                                                                                                                                                                                                                                                                        |
|---------------------|----------------------------------------------------------------------------------------------------------------------------------------------------------------------------------------------------------------------------------------------------------------------------------------------------------------------------------------------------------------------------------------------------------------------------------------------------|
| Moderate            | Positive RT-PCR and typical symptoms of pneumonia, i.e. fever, cough, expectoration, dyspnea, with definitive lesions confirmed by CT scan.                                                                                                                                                                                                                                                                                                        |
| Severe              | Positive RT-PCR and definitive CT imaging with at least one of the following items:<br><ol style="list-style-type: none"><li>1. Respiratory rate <math>\geq 30</math>bpm.</li><li>2. SpO<sub>2</sub> <math>\leq 93\%</math> at rest or pressure of arterial oxygen to fractional inspired oxygen concentration <math>\leq 300</math>mmHg.</li><li>3. More than 50% progression of lesion as evident from CT scan over the past 48 hours.</li></ol> |
| Critical            | Positive RT-PCR and definitive CT imaging with at least one of the following items:<br><ol style="list-style-type: none"><li>1. Intubation needed due to respiratory failure.</li><li>2. Shock.</li><li>3. Multiple organ dysfunction requiring intensive care unit treatment.</li></ol>                                                                                                                                                           |

COVID-19 = coronavirus disease 2019

RT-PCR = real-time reverse transcriptase polymerase chain reaction

CT = computed tomography

SpO<sub>2</sub> = oxygen saturation
